# Supplementary material
Source: publisher figshare collection journal article supplement (https://acs.figshare.com/ndownloader/files/4129462)
Supplement: Supplementary file 1 [file 4129462]

## Supporting information

### Intradiffusion, Density and Viscosity Studies in Binary Liquid Systems of Acetylacetone + Alkanols at 303.15 K

Xiaojuan Chen<sup>a</sup>, Renquan Hu<sup>a</sup>, Huajie Feng<sup>b</sup>, Liuping Chen<sup>a,\*</sup>, Hans-Dietrich  
Lüdemann<sup>c</sup>

<sup>a</sup>, KLGHEI of Environment and Energy Chemistry, School of Chemistry and Chemical Engineering, Sun Yat-sen University, Guangzhou 510275, People's Republic of China; <sup>b</sup>, School of Chemistry and Chemical Engineering, Hainan Normal University, Haikou 571158, People's Republic of China; <sup>c</sup>, Institut für Biophysik und physikalische Biochemie, Universität Regensburg, D-93040 Regensburg, Germany

**<sup>1</sup>H NMR spectrum.** Keto-enol tautomerism is regarded as a slow exchange process compared to NMR time scale <sup>1-2</sup> so that the individual NMR spectrum for two tautomer states can be distinguished for further diffusion measurement. For example in our experiment, the NMR spectrum for mixture of AcAc and ethanol ( $x_1=0.3$ ) shows in Figure 1S.

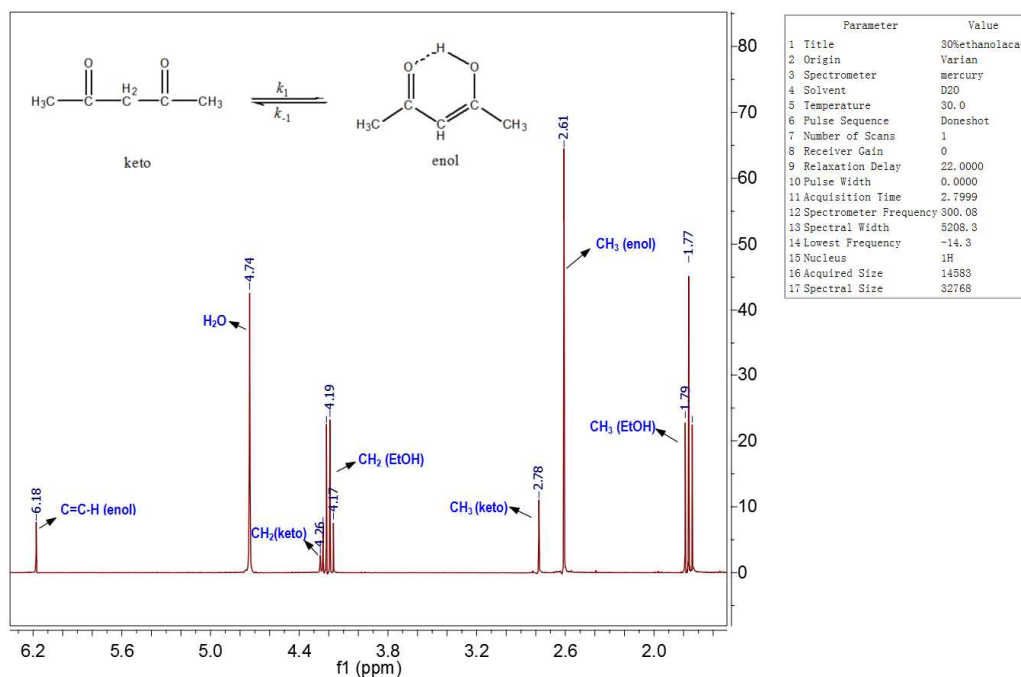

**Figure 1S.** NMR spectrum of mixture of AcAc+ethanol ( $x_1=0.3$ )

**Effect of interconversion rate on diffusion measurement.** It is measured that the conversion rate ( $k_1$ ) from keto to enol form of AcAc in methanol solution to be  $8.11 \times 10^{-3} \text{ s}^{-1}$  at  $30^\circ \text{C}$ ,<sup>3</sup> and the conversion rate ( $k_{-1}$ ) from enol to keto be  $2.43 \times 10^{-3} \text{ s}^{-1}$ . The mean lifetime of keto and enol is thus estimated from reciprocal proportion of  $k_1$  and  $k_{-1}$ , respectively,<sup>4</sup> to be 123 s and 411 s or so. Compared with  $\delta$  value applied in our NMR experiment (1-3 ms), the conversion rate of the tautomerism is sufficiently slow so that the diffusion measurement can be carried out during the application of the pulse gradient.

**<sup>1</sup>H DOSY PFG NMR experimental details.** Diffusion coefficients are calculated according to the Tejskal-Tanner formula<sup>5</sup> or its modification (please see the main article). Pulse sequence “doneshot” was applied in experiment (Figure 2S).<sup>6</sup> Before setting up the DOSY experiment, record a normal s2pul spectrum on the nucleus to be observed, then choose the values of DOSY parameters for a given sample involves determining the proper relationship among three parameters: encoding gradient duration  $gt1$ , its strength  $gzlv11$  and the diffusion delay  $del$ . It may be useful to set  $gt1=0.002$ ,  $del=0.05$  s and to array the gradient strength:  $gzlv11=50, 500, 1000, 1500, 2000$  for our experiment system. For the maximum gradient power used in the DOSY experiment, select the  $gzlv11$  value which attenuates the signal intensities to 5%-15 % of the intensities obtained with the weakest gradient pulse. After having determined suitable values for  $gt1$ ,  $del$  and the maximum gradient power, call the `setup_dosy` macro, then 12 arrayed gradient levels are exerted on all signals which results in signal attenuation (Figure 3S). After the acquisition and data processing, the special DOSY spectrum with diffusion coefficients on the vertical axis and chemical shifts on the horizontal axis will be obtained.<sup>7</sup>

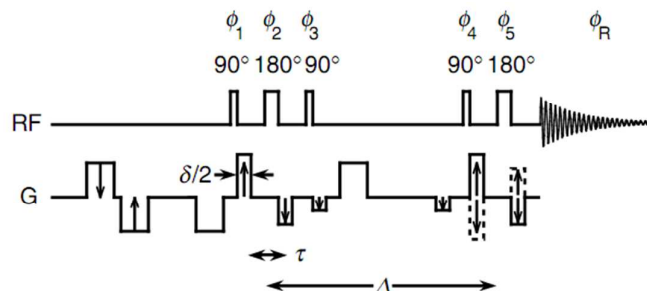

**Figure 2S.** Doneshot pulse sequence

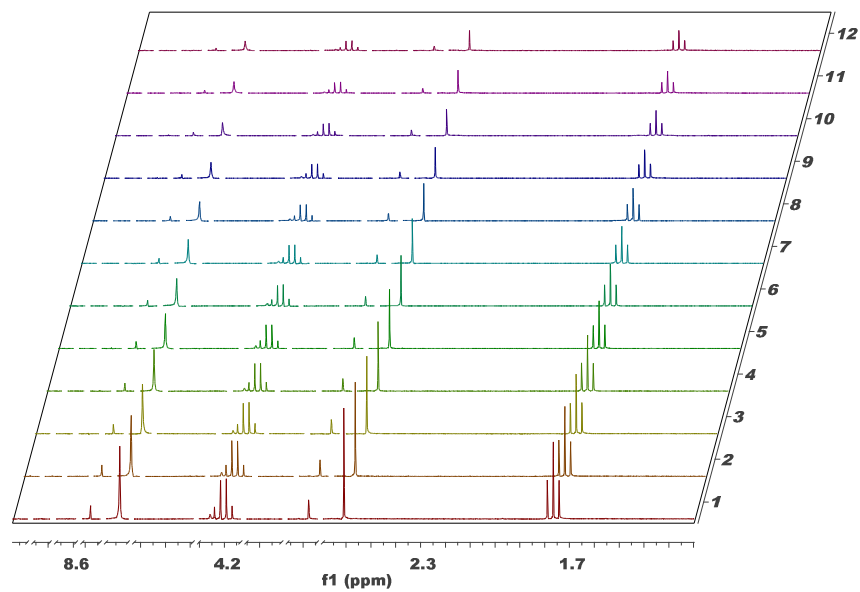

**Figure 3S.** The attenuation of signal with increasing gradient strength

**Calculation of keto-enol equilibrium constant.** As for equilibrium constant of keto-enol tautomerism, the ratio of concentration of keto to enol (i.e.  $K_e = [\text{keto}]/[\text{enol}]$ ) is used to derive this value. It is shown in Figure 4S that the concentration of keto and enol can be easily obtained from the integration of signal concerned, and the result is below:  $K_e = [\text{keto}]/[\text{enol}] = 1/3.78 = 0.26$ .

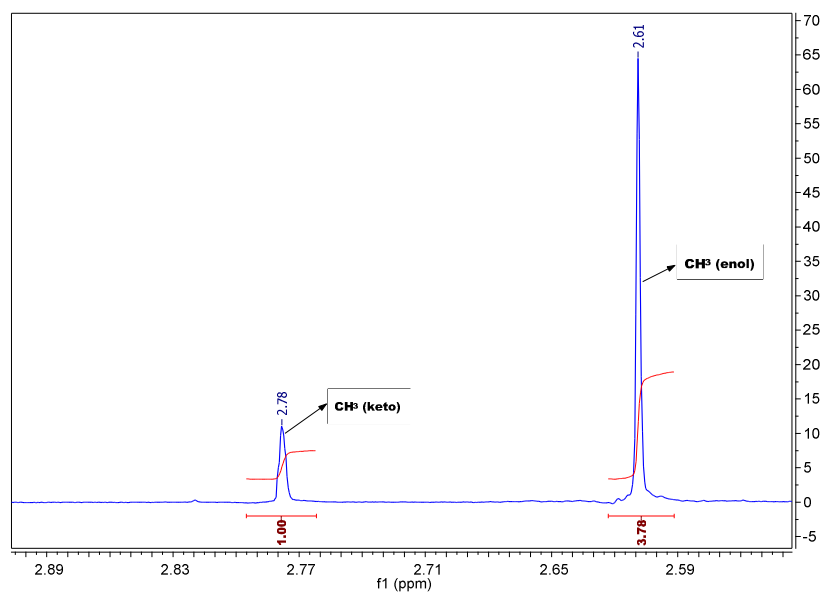

**Figure 4S.** Integration of signal of keto and enol of AcAc

## Reference;

- (1) Cook, G.; Feltman, P. M. Determination of solvent effects on keto-enol equilibria of 1,3-dicarbonyl compounds using NMR. Revisiting a classic physical chemistry experiment. *J. Chem. Edu.* **2007**, *84*, 1827-1829.
- (2) Drexler, E. J.; Field, K.W. An NMR study of keto-enol tautomerism in  $\beta$ -dicarbonyl compound. *J. Chem. Edu.* **1976**, *53*, 392-393.
- (3) Dawber, J. G.; Crane, M. M. Keto-enol tautomerization. A thermodynamic and kinetic study. *J. Chem. Edu.* **1967**, *44*, 150-152.
- (4) Cabrita, E. J.; Berger, S.; Bräuer, P.; Kärger, J. High-resolution DOSY NMR with spins in different chemical surroundings: influence of particle exchange. *J. Magn. Reson.* **2002**, *157*, 124-131.
- (5) Stejskal, E. O.; Tanner, J. E. Spin diffusion measurements: spin echoes in the presence of a time-dependent field gradient. *J. Chem. Phys.* **1965**, *42*, 288-292.
- (6) Pelta, M. D.; Morris, G. A.; Stchedroff, M. J.; Hammond, S. J. A one-shot sequence for high-resolution diffusion-ordered spectroscopy. *Magn. Reson. Chem.* **2002**, *40*, S147-S152.
- (7) Antalek, B. Using pulsed gradient spin echo NMR for chemical mixture analysis: how to obtain optimum results. *Concepts in Magnetic Resonance.* **2002**, *14*, 225-258.
